# Supplementary material for: Antiobesity and Hypolipidemic Potential of Nitraria retusa Extract in Overweight/Obese Women: A Randomized, Double-Blind, Placebo-Controlled Pilot Study
Source: MDPI journal article supplement (doi:10.3390/nu16020317), 2024-01-21
Supplement: s1 [file s1]

# Supplementary Data

## Anti-obesity and Hypolipidemic Potential of *Nitraria retusa* Extract in overweight/obese Women: A Randomized, Double- Blind, placebo- Controlled Pilot Study

Aicha Laouani <sup>1,2</sup>, Hana Nasrallah <sup>1,2</sup>, Awatef Sassi <sup>1,2</sup>, Farhana Ferdousi <sup>3,4</sup>, Feten Zar Kalai <sup>4,5</sup>, Yosra Hasni <sup>6</sup>, Hiroko Isoda <sup>3,4,7,\*</sup> and Saad Saguem <sup>1,2,\*</sup>

<sup>1</sup> Laboratory of Metabolic Biophysics and Applied Pharmacology, Faculty of Medicine, University of Sousse, Tunisia; laouani\_aicha@yahoo.fr (A.L.); hananasrallah.hn@gmail.com (H.N.); awatefsassi@yahoo.fr (A.S.); khaled\_saguem@yahoo.fr (S.S.)

<sup>2</sup> USCR Analytical Platform UHPLC-MS & Research in Medicine and Biology, Faculty of Medicine, University of Sousse, Tunisia

<sup>3</sup> Faculty of Life and Environmental Sciences, University of Tsukuba, Tsukuba 305-8572, Japan; ferdousi.farhana.fn@u.tsukuba.ac.jp (F.F.); isoda.hiroko.ga@u.tsukuba.ac.jp (H.I.)

<sup>4</sup> Alliance for Research on the Mediterranean and North Africa (ARENA), University of Tsukuba, Tsukuba 305-8572, Japan

<sup>5</sup> Laboratory of Aromatic and Medicinal Plants, Center of Biotechnology, Technopark of Borj Cedria, BP 901, 2050 Hammam-Lif, Tunisia; zarfeten@gmail.com (F.Z.K.)

<sup>6</sup> Endocrinology-Diabetology Department, Farhat Hached Hospital, Sousse, Tunisia; yosrahasnielabed@gmail.com (Y.H.)

<sup>7</sup> Open Innovation Laboratory for Food and Medicinal Resource Engineering (FoodMed-OIL), National Institute of Advanced Industrial Science and Technology (AIST), Tsukuba 305-8577, Japan

\* Correspondence: isoda.hiroko.ga@u.tsukuba.ac.jp (H.I.); khaled\_saguem@yahoo.fr (S.S.)

**Supplementary Table S1:** Means of change values  $\pm$  SD per parameter before and after 12 week NRE and placebo intake: Body weight, Body composition, Anthropometric parameters and lipid profile of overweight/ obese participants with BMI < 29.9 Kg/m<sup>2</sup>.

|                    | $\Delta$<br>NRE (N=8) | $\Delta$<br>Placebo (N=3) | <i>p</i> value <sup>a</sup> |
|--------------------|-----------------------|---------------------------|-----------------------------|
| <b>Weight</b>      | -1.01 $\pm$ 0.67      | +0.83 $\pm$ 1.19          | 0.048                       |
| <b>BMI</b>         | -0.35 $\pm$ 0.18      | -0.06 $\pm$ 0.75          | 0.44                        |
| <b>WC</b>          | -3.43 $\pm$ 0.68      | -1.33 $\pm$ 4.95          | 0.609                       |
| <b>BF</b>          | -0.46 $\pm$ 0.35      | +0.43 $\pm$ 0.34          | 0.279                       |
| <b>BM</b>          | +0.15 $\pm$ 0.108     | -0.13 $\pm$ 0.24          | 0.246                       |
| <b>BM/BF</b>       | +0.015 $\pm$ 0.01     | -0.227 $\pm$ 0.029        | 0.197                       |
| <b>BW</b>          | +0.36 $\pm$ 0.25      | -0.4 $\pm$ 0.36           | 0.166                       |
| <b>WC/HC</b>       | -0.25 $\pm$ 0.006     | +0.044 $\pm$ 0.04         | 0.22                        |
| <b>MTC</b>         | -2.41 $\pm$ 0.95      | +1.83 $\pm$ 1.16          | 0.01                        |
| <b>MAC</b>         | -1 $\pm$ 0.53         | +1.16 $\pm$ 2.52          | 0.69                        |
| <b>TG, mmol/L</b>  | -0.0217 $\pm$ 0.086   | +0.06 $\pm$ 0.04          | 0.41                        |
| <b>HDL, mmol/L</b> | -0.038 $\pm$ 0.06     | - 0.026 $\pm$ 0.075       | 0.75                        |
| <b>LDL, mmol/L</b> | -0.43 $\pm$ 0.22      | +0.136 $\pm$ 0.173        | 0.09                        |
| <b>TC, mmol/L</b>  | -0.32 $\pm$ 0.25      | +0.126 $\pm$ 0.18         | 0.286                       |

<sup>a</sup>Between-group differences (NRE vs. Placebo) in the parameters were assessed by independent samples t-test (parametric and equal variances), Welch's t-test (unequal variances) and Mann-Whitney U test (nonparametric)

**Supplementary Table S2:** Means of change values  $\pm$  SD per parameter before and after 12 week NRE and placebo intake: Body weight, Body composition, Anthropometric parameters and lipid profile of overweight/ obese participants with BMI  $\geq 30$  kg/m<sup>2</sup>.

|                    | $\Delta$<br>NRE (N=22) | $\Delta$<br>Placebo (N=10) | <i>p</i> value <sup>a</sup> |
|--------------------|------------------------|----------------------------|-----------------------------|
| <b>Weight</b>      | -2.86 $\pm$ 0.61       | -0.18 $\pm$ 0.43           | <0.001                      |
| <b>BMI</b>         | -1.03 $\pm$ 0.22       | -0.088 $\pm$ 0.18          | 0.01                        |
| <b>WC</b>          | -2.87 $\pm$ 1.25       | -0.66 $\pm$ 0.63           | <0.001                      |
| <b>BF</b>          | -1.26 $\pm$ 0.29       | -0.105 $\pm$ 0.28          | 0.09                        |
| <b>BM</b>          | +0.37 $\pm$ 0.2        | +0.2 $\pm$ 0.22            | 0.11                        |
| <b>BM/BF</b>       | 0.028 $\pm$ 0.009      | 0.0058 $\pm$ 0.008         | 0.07                        |
| <b>BW</b>          | 1.1 $\pm$ 0.2          | 0.2 $\pm$ 0.204            | 0.006                       |
| <b>WC/HC</b>       | 0.0054 $\pm$ 0.0039    | -0.006 $\pm$ 0.004         | 0.34                        |
| <b>MTC</b>         | -3.37 $\pm$ 0.94       | -1.05 $\pm$ 0.78           | 0.039                       |
| <b>MAC</b>         | -1.81 $\pm$ 0.41       | -1.22 $\pm$ 0.66           | 0.37                        |
| <b>TG, mmol/L</b>  | -0.038 $\pm$ 0.14      | +0.1 $\pm$ 0.0088          | 0.016                       |
| <b>HDL, mmol/L</b> | +0.03 $\pm$ 0.031      | +0.065 $\pm$ 0.06          | 0.78                        |
| <b>LDL, mmol/L</b> | 0.38 $\pm$ 0.23        | 0.027 $\pm$ 0.225          | 0.514                       |
| <b>TC, mmol/L</b>  | 0.223 $\pm$ 0.18       | 0.14 $\pm$ 0.29            | 0.93                        |

<sup>a</sup>Between-group differences (NRE vs. Placebo) in the parameters were assessed by independent samples t-test (parametric and equal variances), Welch's t-test (unequal variances) and Mann-Whitney U test (nonparametric)

**Supplementary Table S3:** Means of change values  $\pm$  SD per parameter before and after 12 week NRE and placebo intake: Body weight, Body composition, Anthropometric parameters and lipid profile of overweight/ obese participants with age < 40 years.

| Parametere         | $\Delta$<br>NRE (17) | $\Delta$<br>Placebo (4) | <i>p</i> value <sup>a</sup> |
|--------------------|----------------------|-------------------------|-----------------------------|
| <b>Weight</b>      | -2.51 $\pm$ 0.71     | +1.05 $\pm$ 0.79        | 0.003                       |
| <b>BMI</b>         | -0.9 $\pm$ 0.27      | 0.1 $\pm$ 0.54          | 0.088                       |
| <b>WC</b>          | -3.6 $\pm$ 0.89      | -1.25 $\pm$ 3.59        | 0.333                       |
| <b>BF</b>          | -1.17 $\pm$ 0.33     | 0.11 $\pm$ 0.43         | 0.034                       |
| <b>BM</b>          | +0.42 $\pm$ 0.15     | -0.125 $\pm$ 0.17       | 0.056                       |
| <b>BM/BF</b>       | +0.0311 $\pm$ 0.009  | -0.148 $\pm$ 0.24       | 0.061                       |
| <b>BW</b>          | +1 $\pm$ 0.27        | -0.1 $\pm$ 0.43         | 0.006                       |
| <b>WC/HC</b>       | -0.115 $\pm$ 0.006   | 0.29 $\pm$ 0.33         | 0.019                       |
| <b>MTC</b>         | -2.87 $\pm$ 1.17     | +0,5 $\pm$ 1.63         | 0.129                       |
| <b>MAC</b>         | -1.43 $\pm$ 0.51     | +0.25 $\pm$ 2           | 0.36                        |
| <b>TG, mmol/L</b>  | -0.067 $\pm$ 0.07    | +0.03 $\pm$ 0.086       | 0.21                        |
| <b>HDL, mmol/L</b> | +0.08 $\pm$ 0.27     | +0.1 $\pm$ 0.75         | 0.8                         |
| <b>LDL, mmol/L</b> | -0.29 $\pm$ 0.126    | +0.19 $\pm$ 0.29        | 0.46                        |
| <b>TC, mmol/L</b>  | +0.41 $\pm$ 0.1      | +0.31 $\pm$ 0.31        | 0.31                        |

<sup>a</sup>Between-group differences (NRE vs. Placebo) in the parameters were assessed by independent samples t-test (parametric and equal variances), Welch's t-test (unequal variances) and Mann-Whitney U test (nonparametric)

**Supplementary Table S4:** Means of change values  $\pm$  SD per parameter before and after 12 week NRE and placebo intake: Body weight, Body composition, Anthropometric parameters and lipid profile of overweight/ obese participants with age > 40 years.

|                    | $\Delta$<br>NRE (N=13) | $\Delta$<br>Placebo (N=9) | p value <sup>a</sup> |
|--------------------|------------------------|---------------------------|----------------------|
| <b>Weight</b>      | -1.48 $\pm$ 0.39       | -0.42 $\pm$ 0.45          | 0.048                |
| <b>BMI</b>         | -0.53 $\pm$ 0.17       | -0.17 $\pm$ 0.187         | 0.044                |
| <b>WC</b>          | -2.43 $\pm$ 1.34       | -0.62 $\pm$ 0.617         | 0.037                |
| <b>BF</b>          | -0.58 $\pm$ 0.32       | -0.01 $\pm$ 0.29          | 0.139                |
| <b>BM</b>          | 0.083 $\pm$ 0.19       | 0.23 $\pm$ 0.24           | 0.512                |
| <b>BM/BF</b>       | 0.012 $\pm$ 0.008      | 0.0036 $\pm$ 0.008        | 0.49                 |
| <b>BW</b>          | 0.5 $\pm$ 0.18         | 0.125 $\pm$ 0.199         | 0.203                |
| <b>WC/HC</b>       | -0.0028 $\pm$ 0.015    | -0.0049 $\pm$ 0.004       | 0.301                |
| <b>MTC</b>         | -3.08 $\pm$ 0.59       | -0.5 $\pm$ 0.829          | 0.01                 |
| <b>MAC</b>         | -0.5 $\pm$ 0.61        | -1.06 $\pm$ 0.73          | 0.36                 |
| <b>TG, mmol/L</b>  | -0.075 $\pm$ 0.11      | 0.125 $\pm$ 0.09          | 0.009                |
| <b>HDL, mmol/L</b> | -0.026 $\pm$ 0.06      | 0.033 $\pm$ 0.06          | 0.816                |
| <b>LDL, mmol/L</b> | -0.15 $\pm$ 0.36       | -0.013 $\pm$ 0.22         | 0.809                |
| <b>TC, mmol/L</b>  | -0.18 $\pm$ 0.36       | 0.05 $\pm$ 0.296          | 0.934                |

<sup>a</sup>Between-group differences (NRE vs. Placebo) in the parameters were assessed by independent samples t-test (parametric and equal variances), Welch's t-test (unequal variances) and Mann-Whitney U test (nonparametric)

**Supplementary Table S5:** Means of change values  $\pm$  SD per parameter before and after 12 week NRE and placebo intake: Body weight, Body composition, Anthropometric parameters and lipid profile of overweight/ obese participants participants with BMI < 30 and age < 40.

|                    | $\Delta$<br>NRE (N=4) | $\Delta$<br>Placebo (N=2) | p value <sup>a</sup> |
|--------------------|-----------------------|---------------------------|----------------------|
| <b>Weight</b>      | -1.13 $\pm$ 0.6       | +1.3 $\pm$ 1.9            | 0.128                |
| <b>BMI</b>         | -0.36 $\pm$ 0.34      | -0.1 $\pm$ 1.3            | 0.74                 |
| <b>WC</b>          | -2.83 $\pm$ 1.3       | -2 $\pm$ 8.5              | 0.81                 |
| <b>BF</b>          | -0.73 $\pm$ 0.67      | 0.67 $\pm$ 0.41           | 0.092                |
| <b>BM</b>          | 0.1 $\pm$ 0.208       | -0.2 $\pm$ 0.4            | 0.59                 |
| <b>BM/BF</b>       | 0.02 $\pm$ 0.022      | -0.042 $\pm$ 0.04         | 0.244                |
| <b>BW</b>          | 0.56 $\pm$ 0.49       | -0.65 $\pm$ 0.45          | 0.13                 |
| <b>WC/HC</b>       | -0.022 $\pm$ 0.01     | 0.07 $\pm$ 0.056          | 0.315                |
| <b>MTC</b>         | -2 $\pm$ 2.08         | 2 $\pm$ 2                 | 0.201                |
| <b>MAC</b>         | -0.16 $\pm$ 0.16      | 1.75 $\pm$ 4.25           | 0.36                 |
| <b>TG, mmol/L</b>  | -0.0025 $\pm$ 0.033   | 0.09 $\pm$ 0.07           | 0.256                |
| <b>HDL, mmol/L</b> | -0.0067 $\pm$ 0.05    | 0.09 $\pm$ 0.07           | 0.921                |
| <b>LDL, mmol/L</b> | -0.11 $\pm$ 0.2       | 0.105 $\pm$ 0.29          | 0.577                |
| <b>TC, mmol/L</b>  | 0.14 $\pm$ 0.147      | 0.24 $\pm$ 0.26           | 0.751                |

<sup>a</sup>Between-group differences (NRE vs. Placebo) in the parameters were assessed by independent samples t-test (parametric and equal variances), Welch's t-test (unequal variances) and Mann-Whitney U test (nonparametric)

**Supplementary Table S6:** Means of change values  $\pm$  SD per parameter before and after 12 week NRE and placebo intake: Body weight, Body composition, Anthropometric parameters and lipid profile of overweight/ obese participants with BMI  $\geq 30.0$  Kg/ m<sup>2</sup> and age <40 years.

|                    | $\Delta$<br>NRE (N=13) | $\Delta$<br>Placebo (N=2) | p value <sup>a</sup> |
|--------------------|------------------------|---------------------------|----------------------|
| <b>Weight</b>      | -3.34 $\pm$ 0.93       | 0.8 $\pm$ 0.1             | <0.001               |
| <b>BMI</b>         | -1.22 $\pm$ 0.32       | 0.3 $\pm$ 0.1             | 0.103                |
| <b>WC</b>          | -4.1 $\pm$ 1.24        | -0.5 $\pm$ 2              | 0.041                |
| <b>BF</b>          | -1.44 $\pm$ 0.35       | -0.45 $\pm$ 0.35          | 0.17                 |
| <b>BM</b>          | 0.62 $\pm$ 0.17        | -0.05 $\pm$ 0.05          | 0.07                 |
| <b>BM/BF</b>       | 0.037 $\pm$ 0.009      | 0.0132 $\pm$ 0.014        | 0.214                |
| <b>BW</b>          | 1.26 $\pm$ 0.31        | +0.45 $\pm$ 0.55          | 0.33                 |
| <b>WC/HC</b>       | -0.005 $\pm$ 0.007     | -0.011 $\pm$ 0.008        | 0.613                |
| <b>MTC</b>         | -3.4 $\pm$ 1.41        | -2 $\pm$ 2                | 0.705                |
| <b>MAC</b>         | -2.2 $\pm$ 0.58        | -1.25 $\pm$ 1.25          | 0.842                |
| <b>TG, mmol/L</b>  | 0.02 $\pm$ 0.21        | -0.03 $\pm$ 0.18          | 0.826                |
| <b>HDL, mmol/L</b> | 0.038 $\pm$ 0.033      | +0.11 $\pm$ 0.17          | 0.909                |
| <b>LDL, mmol/L</b> | 0.33 $\pm$ 0.28        | +0.28 $\pm$ 0.64          | 0.54                 |
| <b>TC, mmol/L</b>  | 0.09 $\pm$ 0.139       | 0.38 $\pm$ 0.73           | 0.377                |

<sup>a</sup>Between-group differences (NRE vs. Placebo) in the parameters were assessed by independent samples t-test (parametric and equal variances), Welch's t-test (unequal variances) and Mann-Whitney U test (nonparametric)

**Supplementary Table S7:** Means of change values  $\pm$  SD per parameter before and after 12 week NRE and placebo intake: Body weight, Body composition, Anthropometric parameters and lipid profile of overweight/ obese participants with BMI  $\geq 30.0$  and age  $>40$ .

|             | $\Delta$<br>NRE (N=9) | $\Delta$<br>Placebo (N=8) | p value <sup>a</sup> |
|-------------|-----------------------|---------------------------|----------------------|
| Weight      | -2.06 $\pm$ 0.29      | -0.47 $\pm$ 0.51          | 0.005                |
| BMI         | -0.73 $\pm$ 0.23      | -0.2 $\pm$ 0.214          | 0.034                |
| WC          | -0.83 $\pm$ 2.48      | -0.71 $\pm$ 0.7           | 0.159                |
| BF          | -0.96 $\pm$ 0.54      | -0.0006 $\pm$ 0.33        | 0.254                |
| BM          | -0.033 $\pm$ 0.39     | 0.27 $\pm$ 0.28           | 0.9                  |
| BM/BF       | 0.01 $\pm$ 0.01       | 0.0037 $\pm$ 0.009        | 0.588                |
| BW          | 0.83 $\pm$ 0.06       | 0.128 $\pm$ 0.23          | 0.222                |
| WC/HC       | 0.022 $\pm$ 0.02      | -0.0043 $\pm$ 0.0057      | 0.87                 |
| MTC         | -3.33 $\pm$ 1.3       | -0.78 $\pm$ 0.89          | 0.035                |
| MAC         | -1.16 $\pm$ 0.33      | -1.21 $\pm$ 0.82          | 0.209                |
| TG, mmol/L  | -0.136 $\pm$ 0.164    | 0.14 $\pm$ 0.105          | 0.006                |
| HDL, mmol/L | 0.0167 $\pm$ 0.07     | 0.052 $\pm$ 0.074         | 0.72                 |
| LDL, mmol/L | 0.48 $\pm$ 0.47       | -0.0443 $\pm$ 0.25        | 0.18                 |
| TC, mmol/L  | 0.43 $\pm$ 0.46       | 0.071 $\pm$ 0.34          | 0.48                 |

<sup>a</sup>Between-group differences (NRE vs. Placebo) in the parameters were assessed by independent samples t-test (parametric and equal variances), Welch's t-test (unequal variances) and Mann-Whitney U test (nonparametric)
